# Supplementary material for: Identifying barriers and facilitators to implementation of community-based tuberculosis active case finding with mobile X-ray units in Lima, Peru: a RE-AIM evaluation
Source: HighWire-hosted journal article supplement (doi:10.1136/bmjopen-2021-050314), 2021-07-01

**Supplementary figures for “Identifying barriers and facilitators to implementation of community-based tuberculosis active case-finding with mobile X-ray units in Lima, Peru: a RE-AIM evaluation”**

**Figure S1: Screening algorithm used at mobile screening units**

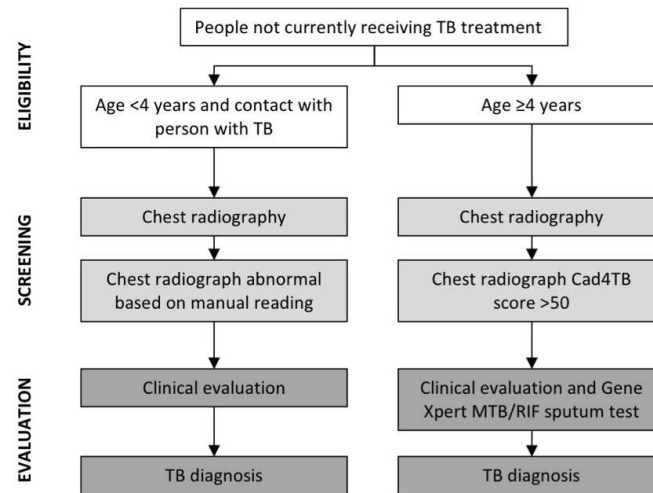

**Figure S2: Percent of intervention area residents reached, by district and age**

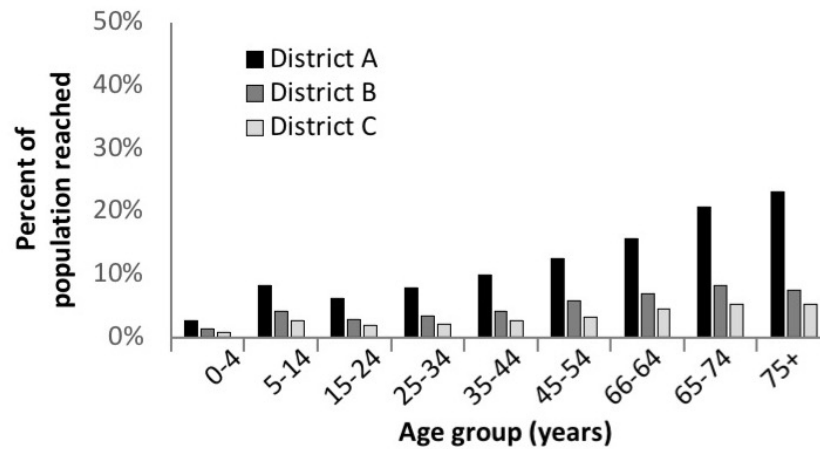

**Figure S3: Quarterly case notifications in intervention districts.** Blue circles represent pre-intervention quarters, orange diamonds represent intervention quarters. The blue line represents the linear trend established by the pre-intervention quarters.

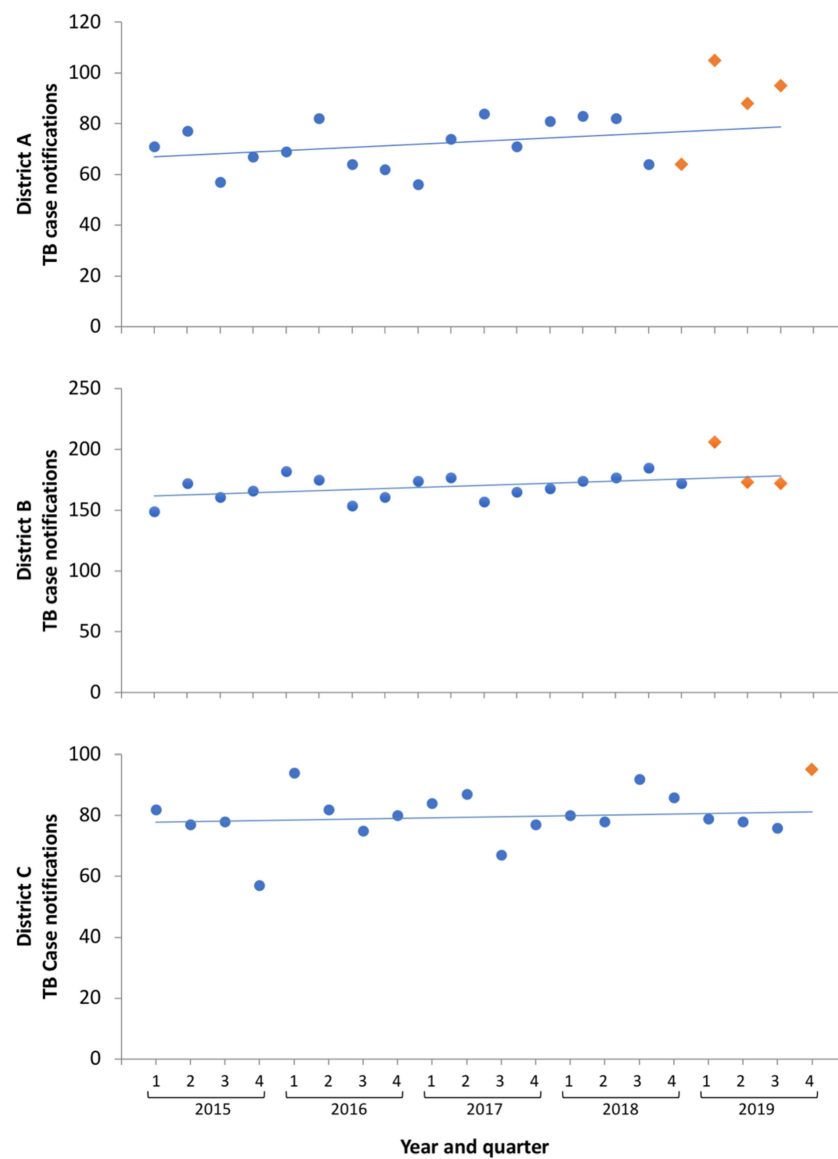

Supplement: bmjopen-2021-050314supp001_data_supplement.pdf [file bmjopen-2021-050314supp001_data_supplement.pdf]
